# Supplementary material for: Synthesis and characterization of a supported Pd complex on carbon nanofibers for the selective decarbonylation of stearic acid to 1-heptadecene: the importance of subnanometric Pd dispersion
Source: Royal Society of Chemistry journal article supplement (doi:10.1039/d0cy00322k), 2020-01-01
Supplement: d0cy00322k1.pdf [file d0cy00322k1.pdf]

## SUPPLEMENTARY INFORMATION

### **Synthesis and characterization of supported Pd complex on carbon nanofibers for the selective decarbonylation of stearic acid to 1-heptadecene: the importance of subnanometric Pd dispersion.**

Elba Ochoa <sup>a,†</sup>, Wilson Henao <sup>a,†</sup>, Sara Fuertes <sup>b</sup>, Daniel Torres <sup>a</sup>, Tomas van Haasterecht <sup>c</sup>, Elinor Scott <sup>c</sup>, Harry Bitter <sup>c</sup>, Isabel Suelves <sup>a</sup>, Jose Luis Pinilla <sup>\*a</sup>

<sup>a</sup> Instituto de Carboquímica, CSIC, Miguel Luesma Castán 4, 50018 Zaragoza, Spain

<sup>b</sup> Departamento de Química Inorgánica, Facultad de Ciencias, Instituto de Síntesis Química y Catálisis Homogénea (ISQCH), CSIC - Universidad de Zaragoza, Pedro Cerbuna 12, Zaragoza, 50009, Spain

<sup>c</sup> Biobased Chemistry and Technology, Wageningen University, P.O. Box 17, Wageningen, 6700 AA, Netherlands

(\* *corresponding author: [jlpinilla@icb.csic.es](mailto:jlpinilla@icb.csic.es)*)

(† *These authors contributed equally to this work*)

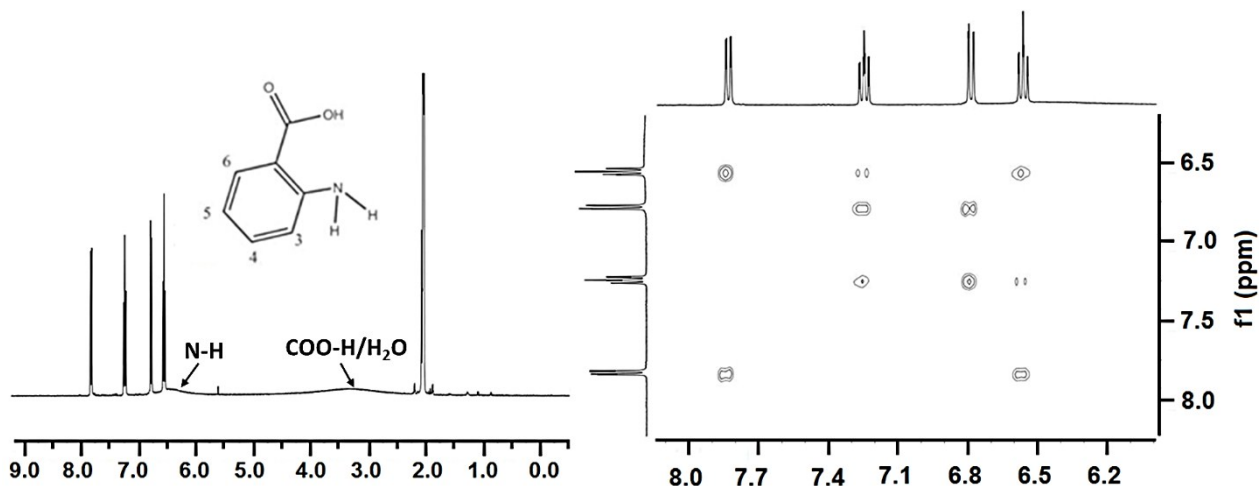

**Figure S1.**  $^1\text{H}$  NMR (left) and  $^1\text{H}$ - $^1\text{H}$  COSY (right) spectra of anthranilic acid in acetone- $d_6$ . Inset: scheme of the chemical structure of anthranilic acid.  $^1\text{H}$  NMR (400 MHz, acetone- $d_6$ ):  $\delta$ = 7.83 (1H, dd,  $^3J_{\text{H3-H4}} = 8.1$ ,  $^4J_{\text{H3-H5}} = 1.6$ , H3), 7.25 (1H, ddd,  $^3J_{\text{H5-H6}} = 8.4$ ,  $^3J_{\text{H5-H4}} = 7.1$ ,  $^4J_{\text{H5-H3}} = 1.6$ , H5), 6.79 (1H, dd,  $^3J_{\text{H6-H5}} = 8.4$ ,  $^4J_{\text{H6-H4}} = 1.1$ , H6), 6.56 (1H, ddd,  $^3J_{\text{H4-H3}} = 8.1$ ,  $^3J_{\text{H4-H5}} = 7.1$ ,  $^4J_{\text{H4-H6}} = 1.1$ , H4), 6.41 (s, br,  $\text{NH}_2$ ), 3.30 (s, br, COOH).

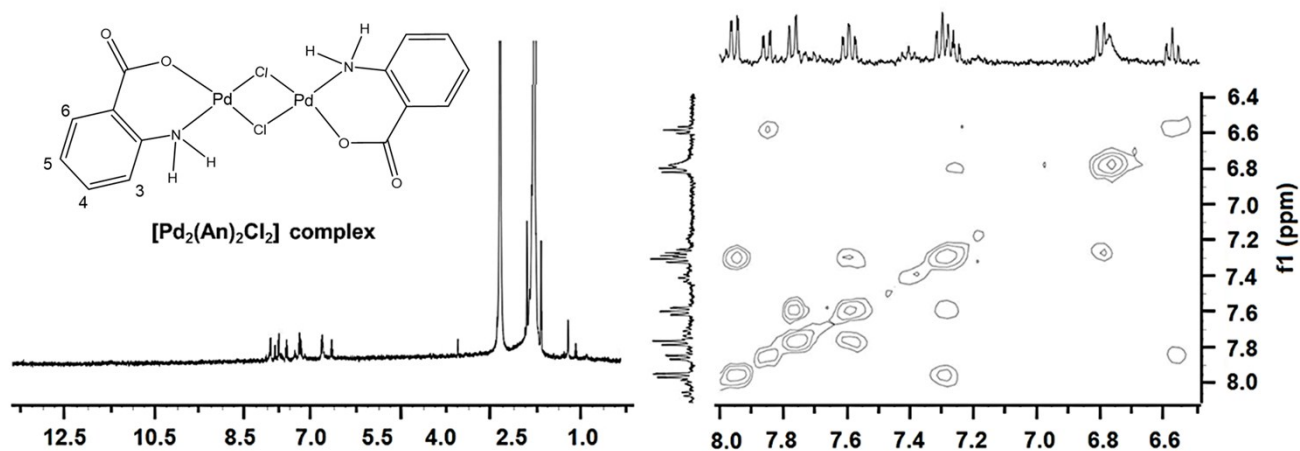

**Figure S2.**  $^1\text{H}$  NMR (left) and  $^1\text{H}$ - $^1\text{H}$  COSY (right) spectra of  $[\text{Pd}_2(\text{An})_2\text{Cl}_2]$  complex in acetone- $d_6$ . Inset: scheme of the proposed chemical structure of  $[\text{Pd}_2(\text{An})_2\text{Cl}_2]$  complex.  $^1\text{H}$  NMR (400 MHz, acetone- $d_6$ ):  $\delta$ = 7.93 (1H, dd,  $^3J_{\text{H3-H4}} = 7.4$ ,  $^4J_{\text{H3-H5}} = 1.4$ , H3), 7.75 (1H, d,  $^3J_{\text{H6-H5}} = 8.4$ , H6), 7.57 (1H, td,  $^3J_{\text{H5-H6}} = ^3J_{\text{H5-H4}} = 7.5$ ,  $^4J_{\text{H5-H3}} = 1.5$ , H5), 7.28 (1H, t,  $^3J_{\text{H4-H3}} = ^3J_{\text{H4-H5}} = 7.4$ , H4), 6.76 (s, br,  $\text{NH}_2$ ).

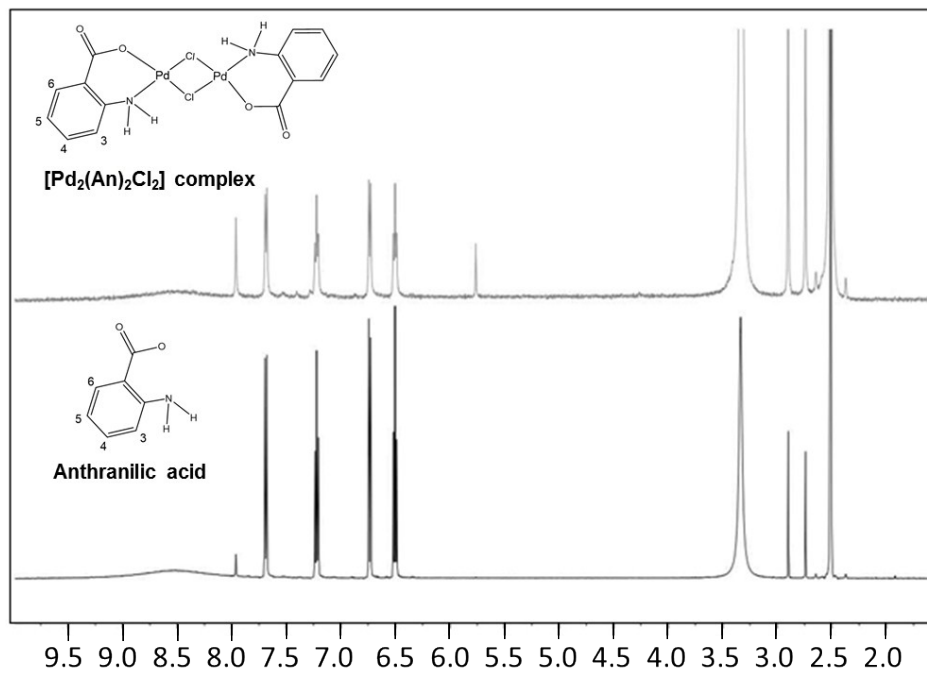

**Figure S3.** <sup>1</sup>H NMR spectra of [Pd<sub>2</sub>(An)<sub>2</sub>Cl<sub>2</sub>] (top) and anthranilic acid (bottom) in DMSO-*d*<sub>6</sub>.

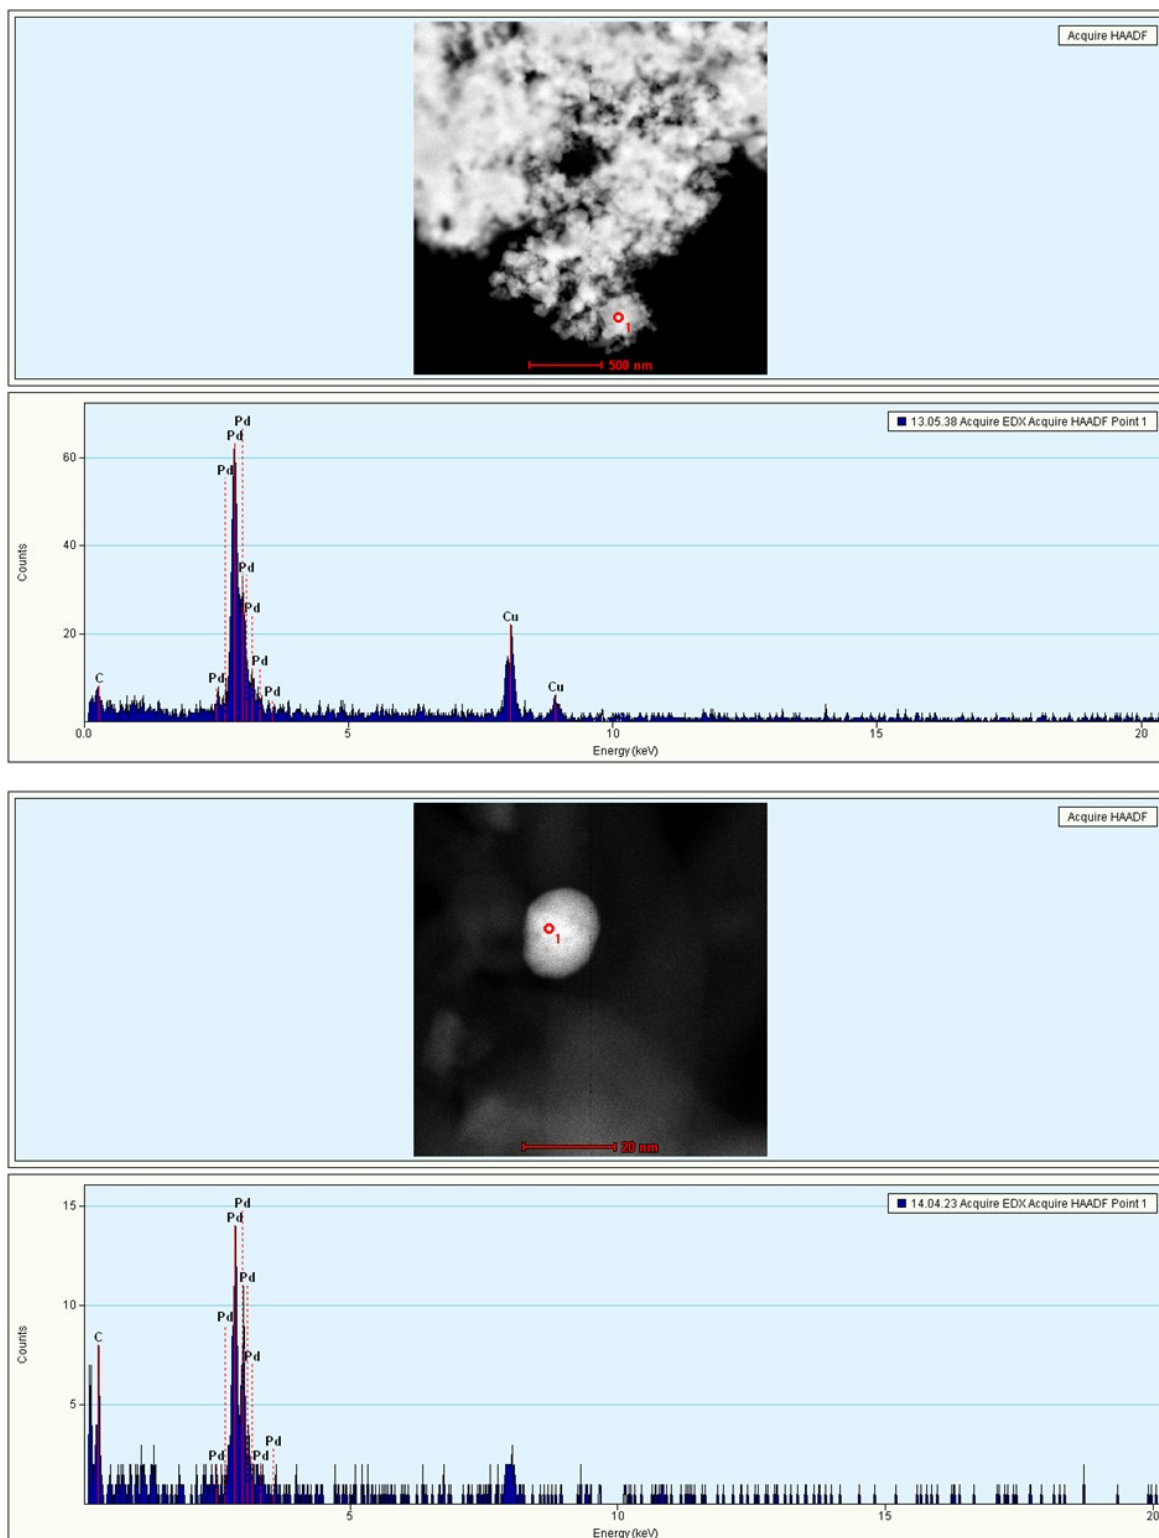

**Figure S4.** Energy-dispersive X-ray spectra of AnPd/CNF (EtOH)

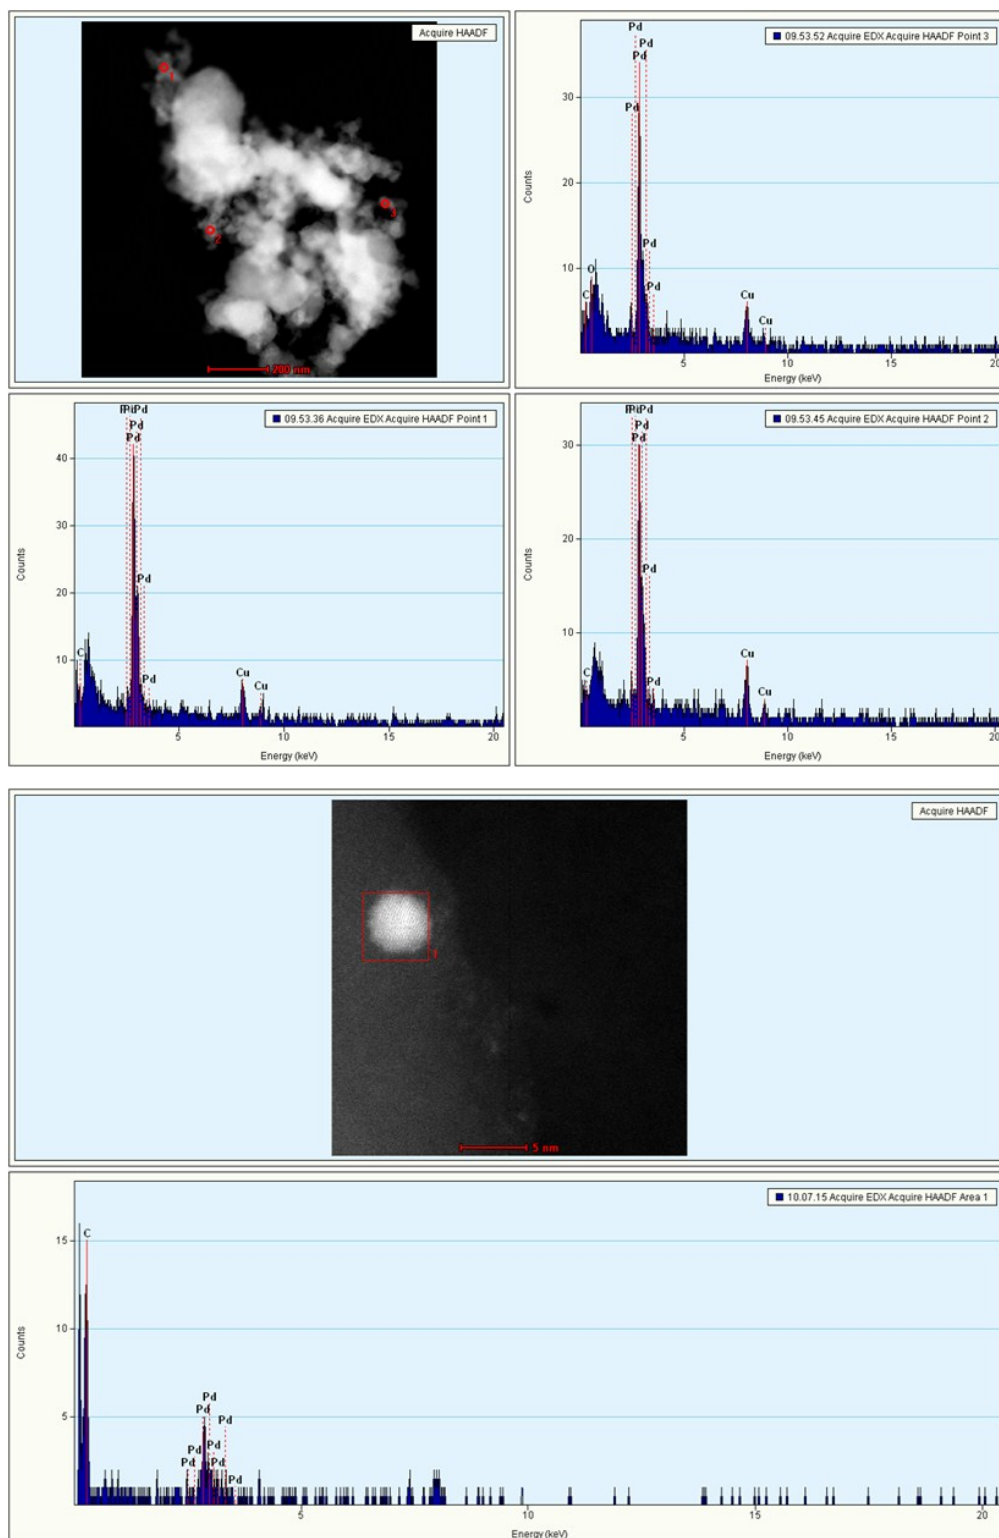

**Figure S5.** Energy-dispersive X-ray spectra of AnPd/CNF (DMF).

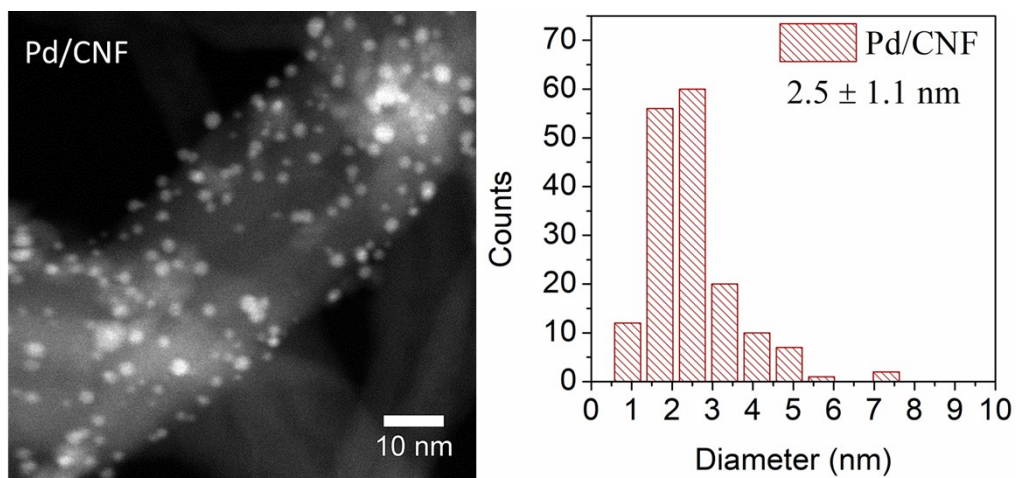

**Figure S6.** STEM-HAAD micrograph and metal particle size distribution of a 0.6 wt.%Pd/CNF heterogeneous catalyst prepared by incipient wetness impregnation and further reduction with H<sub>2</sub>.
